# Supplementary material for: Association of Severe Bronchiolitis during Infancy with Childhood Asthma Development: An Analysis of the ECHO Consortium
Source: MDPI journal article supplement (doi:10.3390/biomedicines11010023), 2022-12-22
Supplement: s1 [file s1]

## SUPPLEMENTARY ONLINE CONTENT

**Association of severe bronchiolitis during infancy with childhood asthma development:  
An analysis of the ECHO consortium**

Authors: Makiko Nanishi MD; Aruna Chandran MD, MPH; Xiuhong Li MAS; Joseph B. Stanford MD, MSPH; Akram N. Alshawabkeh PhD; Judy L. Aschner MD, PhD; Dana Dabelea MD, PhD; Anne L. Dunlop MD, MPH; Amy J. Elliott PhD; James Gern MD; Tina Hartert, MD, MPH; Julie Herbstman PhD; Gurjit K. Khurana Hershey, MD, PhD; Alison E. Hipwell PhD, ClinPsyD; Margaret R. Karagas PhD; Catherine J. Karr MD, PhD; Leslie D. Leve PhD; Augusto A. Litonjua, MD, MPH; Cindy T. McEvoy MD; Rachel L. Miller MD; Emily Oken MD, MPH; T. Michael O'Shea MD, MPH; Nigel Paneth MD, MPH; Scott T. Weiss MD; Robert O. Wright, MD MPH; Rosalind J. Wright MD, MPH; Kecia N. Carroll MD MPH; Xueying Zhang PhD; Qi Zhao; Edward Zoratti MD; Carlos A. Camargo Jr. MD, DrPH; Kohei Hasegawa MD, MPH, PhD and Environmental Influences on Child Health Outcomes (ECHO) collaborators

**Contents**

**Table S1.** Principal investigators (PIs) of the 53 participating cohorts in the ECHO program

**Table S2.** The number of missing data for each of major variables

**Table S3.** Test for interactions between bronchiolitis hospitalization during infancy and major demographic factors on the risk of asthma development

**Figure S1.** Locations of enrollment cohorts for children included in the analyses

**Figure S2.** Study flow

**Figure S3.** Associations of bronchiolitis hospitalization in infancy with the subsequent development of asthma (complete case analysis)

**Figure S4.** Stratified analysis for the multivariable associations of bronchiolitis hospitalization during infancy with the development of asthma by major demographic and clinical factors

**Table S1. Principal investigators (PIs) of the 53 participating cohorts in the ECHO program**

| Cohort PI                      | Cohort name                                                                                    |
|--------------------------------|------------------------------------------------------------------------------------------------|
| Akram Alshawabkeh, PhD         | ECHO in Puerto Rico                                                                            |
| Gloria Pryhyber, MD            | Prematurity and Respiratory Outcomes Program (DINE-PROP)                                       |
| Roberta Keller, MD             | Trial of Late Surfactant (TOLSURF)                                                             |
| Annemarie Stroustrup, MD, MPH  | NICU Hospital Exposures and Long-Term Health (DINE-NICUHEALTH)                                 |
| Dennis Mayock, MD              | Preterm Erythropoietin Neuroprotection Trial (DINE-PENUT)                                      |
| Clancy Blair, MPH, PhD         | Family Life Project (FLP)                                                                      |
| Carlos Camargo, MD, DrPH       | The 35th Multicenter Airway Research Collaboration (MARC-35) cohort                            |
| Carlos Camargo, MD, DrPH       | The 43rd Multicenter Airway Research Collaboration (MARC-43) cohort                            |
| Dana Dabelea, MD, PhD          | The Healthy Start Study                                                                        |
| Sean Deoni, PhD                | Myelination and Behavior across Maturation (BAMBAM) study                                      |
| Cristiane Duarte, MPH, PhD     | The Boricua Youth Study (BYS)                                                                  |
| Anne Dunlop, MD, MPH           | Atlanta ECHO Cohort of Emory University                                                        |
| Amy Elliott, PhD               | The Safe Passage Study                                                                         |
| Assiamira Ferrara, MD, PhD     | Pregnancy Environment and Lifestyle Study (PETALS)                                             |
| Lisa Croen, PhD                | Kaiser Permanente Research Bank (KPRB)                                                         |
| Edward Zoratti, MD             | Microbes, Allergy, Asthma & Pets Study (MAAP)                                                  |
| Christine Seroogy, MD          | Wisconsin Infant Study Cohort (WISC)                                                           |
| Leonard Bacharier, MD          | Urban Environment and Childhood Asthma (URECA)                                                 |
| Neeru Hershey, MD, PhD         | Cincinnati Childhood Allergy & Air Pollution Study (CCAAPS)                                    |
| Tina Hartert, MD, MPH          | Infant Susceptibility to Pulmonary Infections and Asthma Following RSV Exposure (INSPIRE)      |
| Christine Johnson, MPH, PhD    | Wayne County Health Environment Allergy and Asthma (WHEALS)                                    |
| Irva Picciotto, MPH, PhD       | Revising the CHARGE Study children (ReCHARGE)                                                  |
| Alison Hipwell, PhD            | Pittsburgh Girls Study                                                                         |
| Margaret Karagas, PhD          | New Hampshire Birth Cohort Study                                                               |
| Frances TyLavsky, DrPH         | Conditions Affecting Neurocognitive Development and Learning in Early Childhood (CANDLE) Study |
| Sheela Sathyanarayana, MD, MPH | Global Alliance to Prevent Prematurity and Stillbirth (GAPPS) study                            |
| Barry Lester, PhD              | Neonatal Neurobehavior and Outcomes in Very Preterm Infant (ECHO-NOVI)                         |
| Leslie Leve, PhD               | Early Growth and Development Study (EGDS-CI)                                                   |
| Jenae Neiderhiser, PhD         | Early Growth and Development Study - Cohort II                                                 |

|                                                    |                                                                                              |
|----------------------------------------------------|----------------------------------------------------------------------------------------------|
| Leslie Leve, PhD                                   | Early Parenting of Children                                                                  |
| Scott Weiss, MD                                    | The Vitamin D Antenatal Asthma Reduction Trial (VDAART)                                      |
| Cynthia McEvoy, MD                                 | Vitamin C to Decrease Effects of Smoking in Pregnancy on Infant Lung Function (VCSIP)        |
| Cynthia McEvoy, MD                                 | In-Utero Smoke, Vitamin C, and Newborn Lung Function                                         |
| Rebecca Landa, PhD                                 | Kennedy Krieger Institute, the Baby Siblings Research Consortium (BSRC)                      |
| Sally Ozonoff, PhD                                 | University of California Davis - BSRC                                                        |
| Rebecca Schmidt, PhD                               | University of California, Markers of Autism Risk in Babies-Learning Early Signs (MARBLES)    |
| Joseph Piven, MD                                   | Infant Brain Imaging Study (IBIS)                                                            |
| Lisa Croen, PhD                                    | Early Autism Risk Longitudinal Investigation (EARLI)                                         |
| Emily Oken, MD, MPH                                | The Project Viva cohort                                                                      |
| Mike O'Shea, MD, MPH                               | Extremely Low Gestational Age Newborn (ELGAN) study                                          |
| Nigel Paneth, MD, MPH                              | Archive for Research in Child health (ARCH)                                                  |
| Julie Herbstman, PhD                               | Sibling Cohort                                                                               |
| Joseph Stanford, MD, MSPH                          | National Childrens Study IVS Salt Lake County (NCS-IVS)                                      |
| Joseph Stanford, MD, MSPH                          | Alternate Recruitment Strategy Cache County (NCS-ARS)                                        |
| Christy Porucznik, PhD, MSPH                       | Home Observation of Periconceptional Exposures Utah (HOPE-Utah)                              |
| Robert Silver, MD                                  | Nulliparous Pregnancy Outcomes Study: Monitoring Mothers to be (NuMoM2B-Utah)                |
| Joseph Stanford, MD, MSPH                          | Time to Pregnancy - Utah (TTP-Utah)                                                          |
| Elisabeth Conradt, PhD                             | Baby Affect & behavior Study (BABY-Utah)                                                     |
| Rosalind Wright, MD, MPH                           | Asthma Coalition on Community, Environment & Social Stress (ACCESS)                          |
| Rosalind Wright, MD, MPH                           | PRogramming of Intergenerational Stress Mechanisms                                           |
| Kathi Huddleston, PhD                              | First 1000 Days Inova Childhood Longitudinal Study                                           |
| Catherine Karr, MD, PhD, Leonard Trasande, MD, MPP | The Infant Development and Environment Study (TIDES)                                         |
| Frederica Perera, MPH, DrPH, PhD                   | Columbia Center for Children's Environmental Health (CCCEH) / Mothers and Newborns (M and N) |

---

**Table S2. The number of missing data for each of major variables**

|                                 | <b>The number of<br/>missing data</b> |
|---------------------------------|---------------------------------------|
| <b>Child characteristics</b>    |                                       |
| Sex                             | 0                                     |
| Race and ethnicity              | 75 (<1%)                              |
| Gestational age                 | 1516 (13%)                            |
| Perinatal breastfeeding         | 5158 (44%)                            |
| Atopy*                          | 6155 (52%)                            |
| Parental history of asthma      | 2260 (19%)                            |
| <b>Maternal characteristics</b> |                                       |
| Prenatal smoking                | 2151 (18%)                            |
| Maternal age at delivery        | 1088 (9%)                             |
| Maternal education              | 1225 (10%)                            |

\* Including healthcare provider-diagnosed eczema, food allergy, and allergic rhinitis

**Table S3. Test for interactions between bronchiolitis hospitalization during infancy and major demographic factors on the risk of asthma development**

| <b>Demographic factor</b> | <b>P<sub>interaction</sub></b> |
|---------------------------|--------------------------------|
| Sex                       | 0.91                           |
| Race and ethnicity        | 0.02                           |
| Gestational age           | 0.54                           |
| Breastfeeding             | 0.07                           |
| Atopy*                    | 0.34                           |
| Parent asthma             | 0.89                           |
| Parent smoking            | 0.45                           |
| Maternal age at delivery  | 0.60                           |

\* Including healthcare provider-diagnosed eczema, food allergy, and allergic rhinitis

**Figure S1. Locations of ECHO enrollment cohorts included in the current analyses**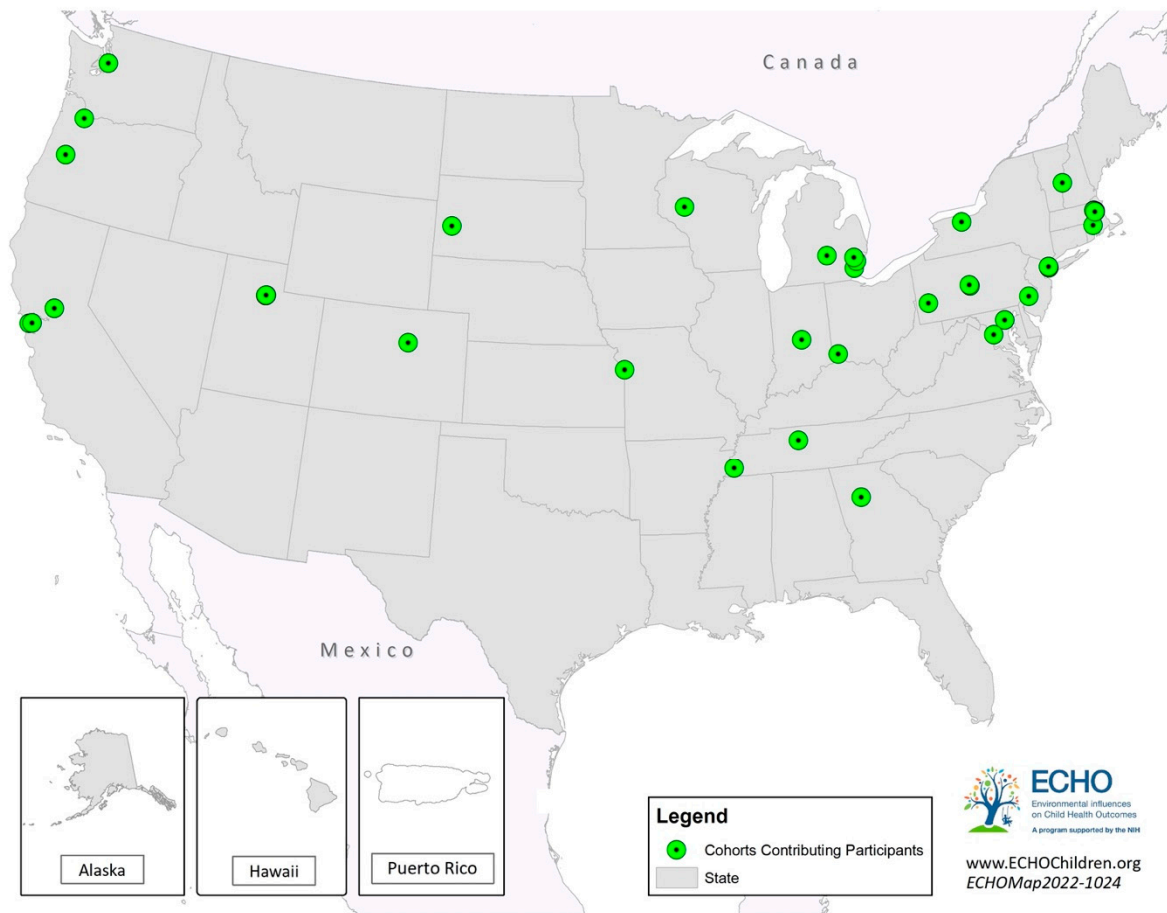

**Figure S2. Study flow**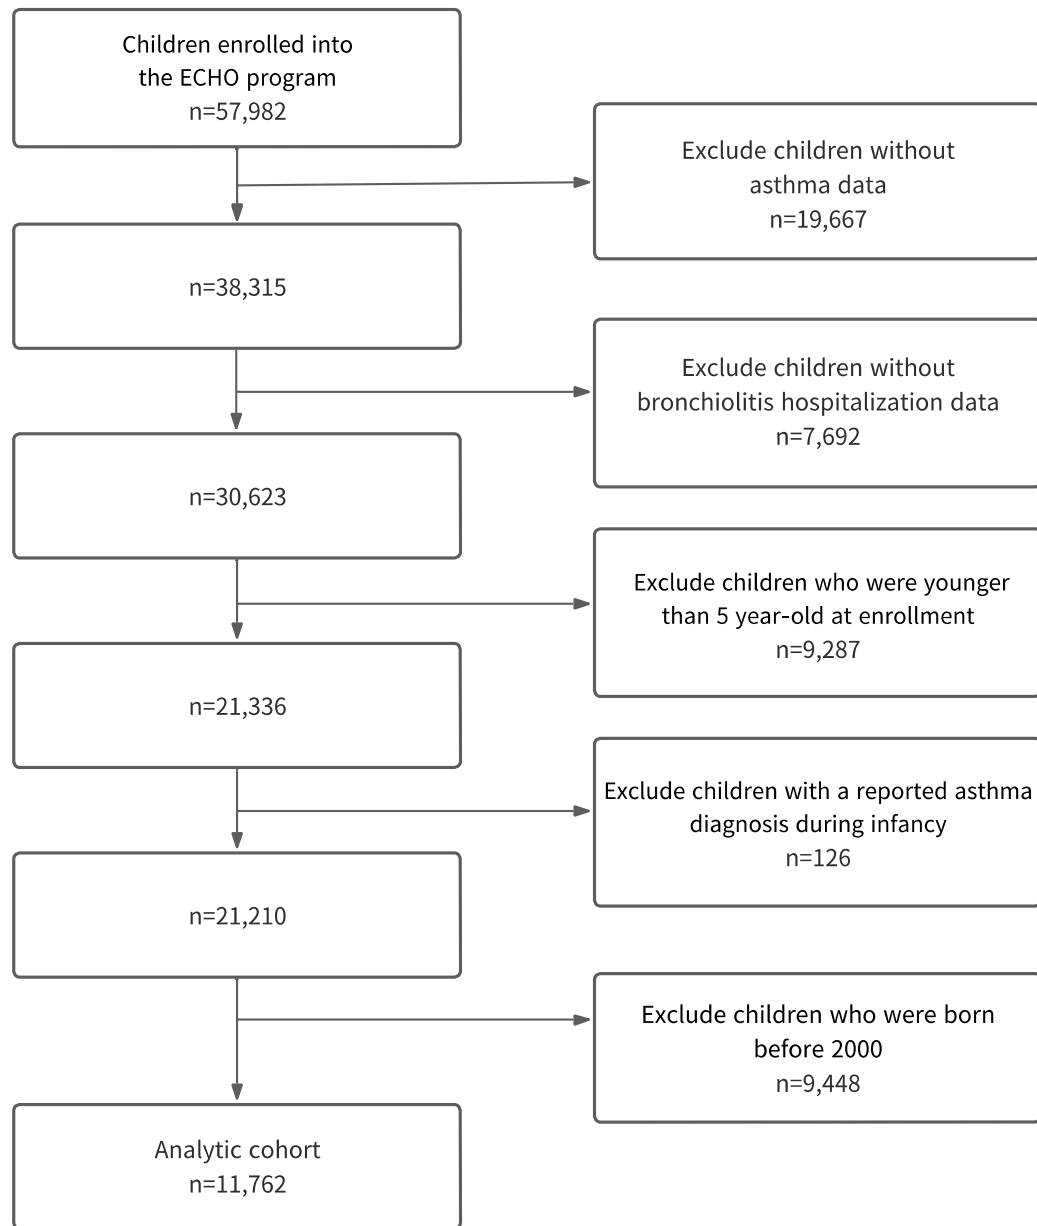

**Figure S3. Associations of bronchiolitis hospitalization in infancy with the subsequent development of asthma (complete case analysis)**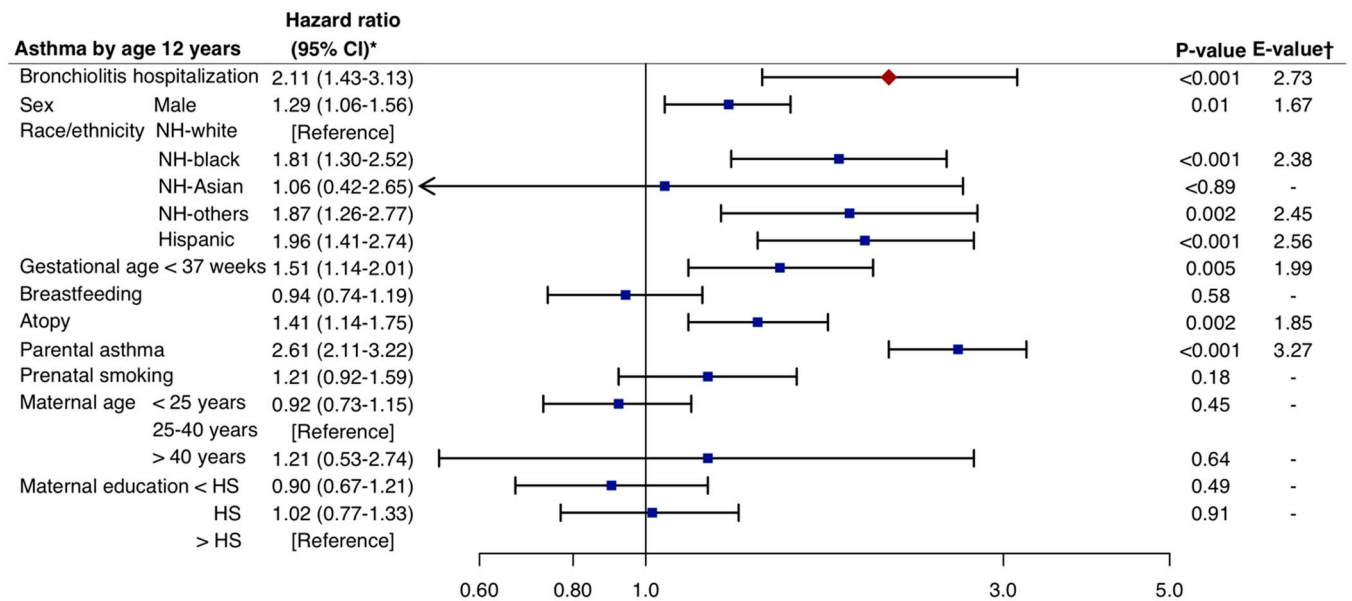



**Figure S4. Stratified analysis for the multivariable association of bronchiolitis hospitalization during infancy with the development of asthma by major demographic and clinical factors**

**A) Stratification by sex**

**A-1) Male**

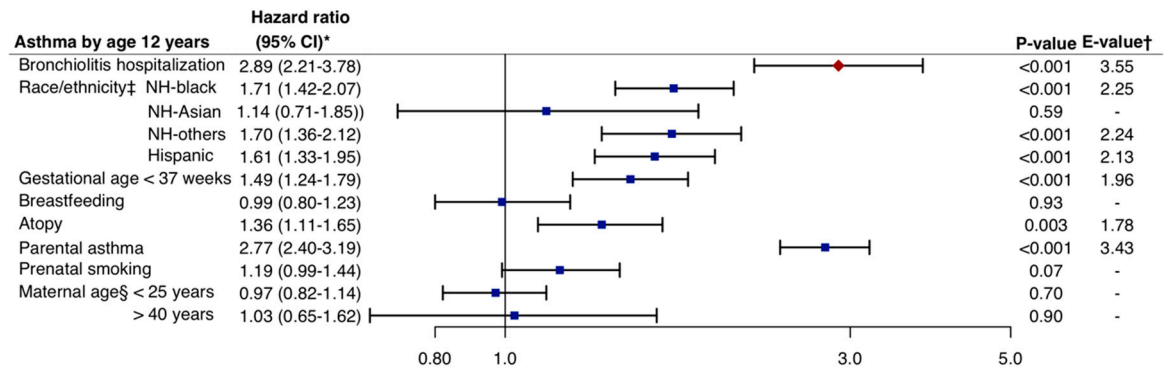

**A-2) Female**

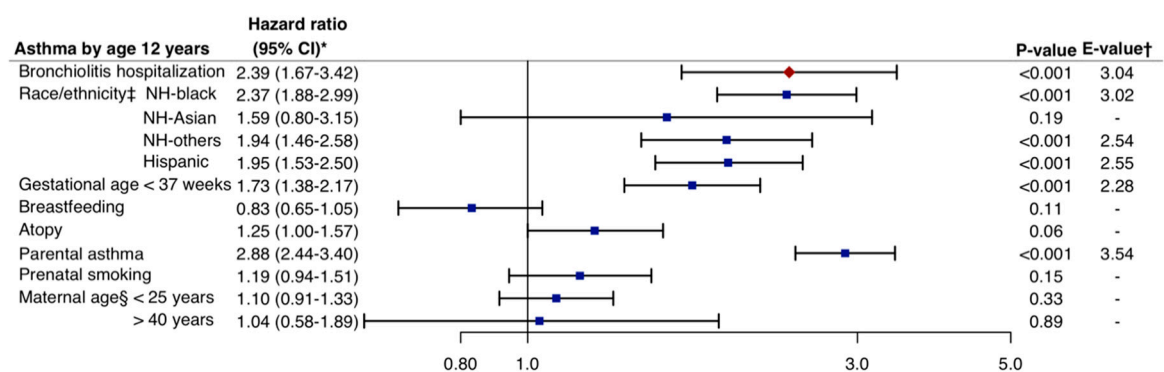

**B) Stratification by race and ethnicity**

**B-1) Non-Hispanic white**

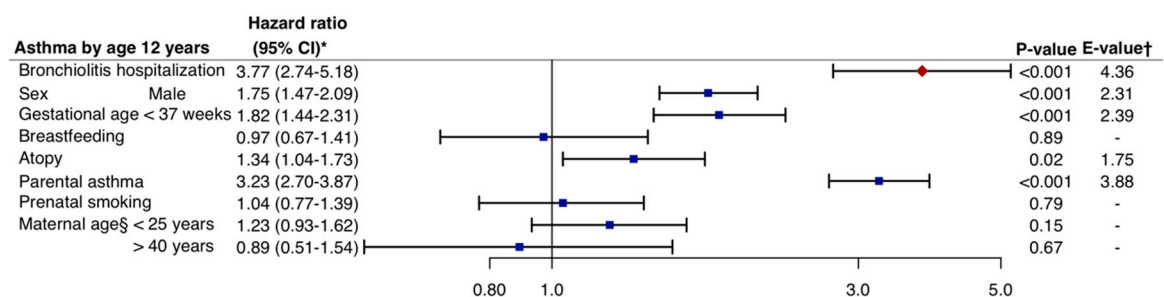

**B-2) Non-Hispanic black**

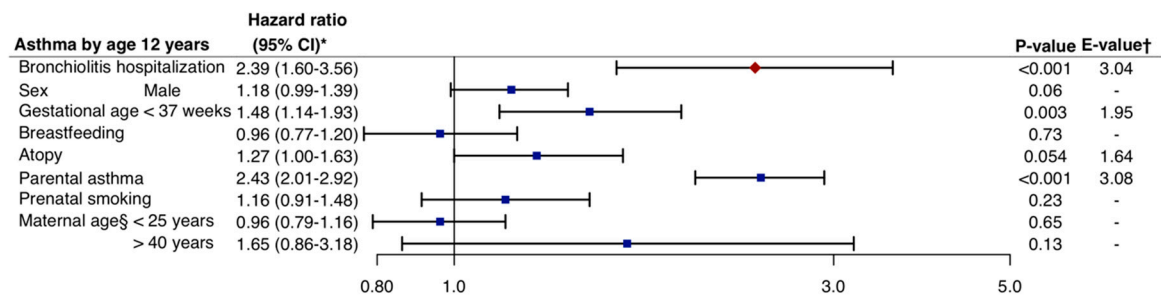

### B-3) Non-Hispanic Asian

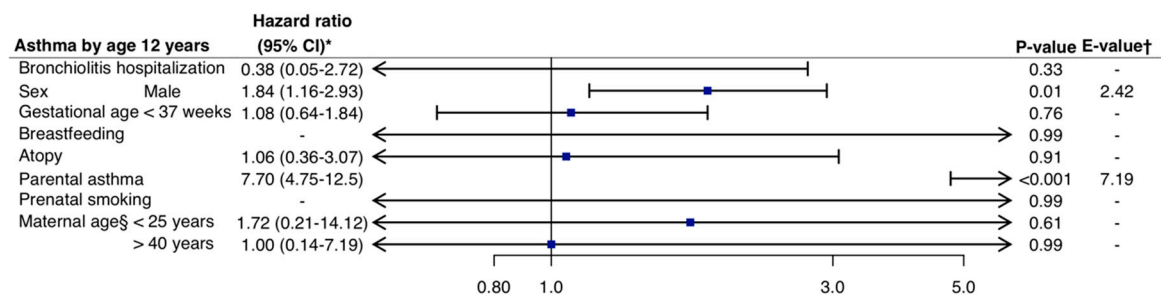

### B-4) Non-Hispanic others

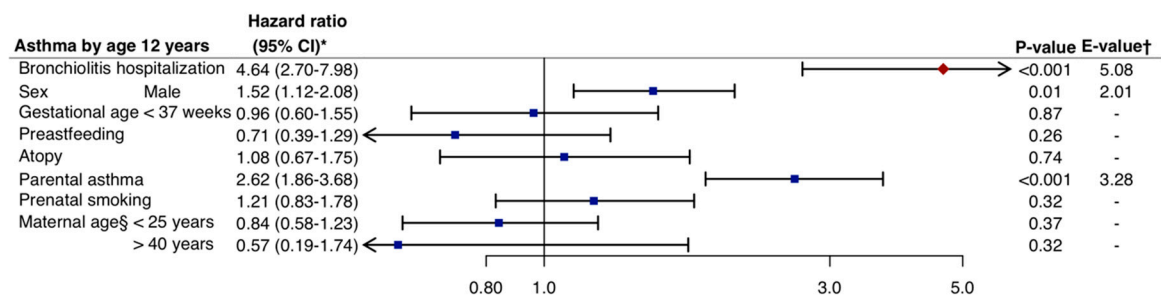

### B-5) Hispanic

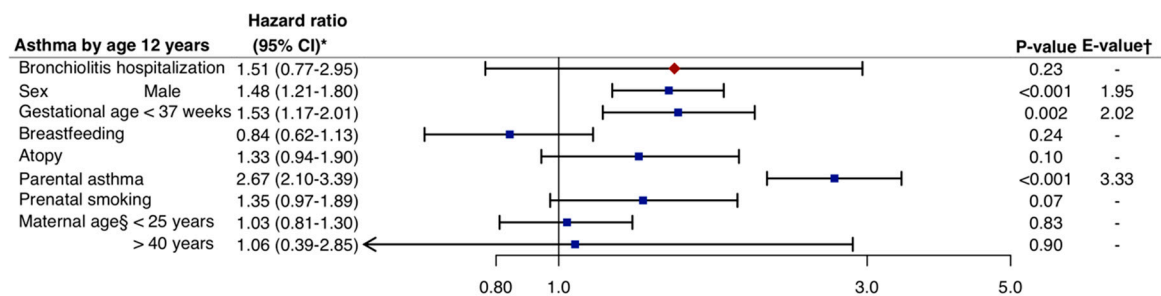

## C) Stratification by gestational age

### C-1) Gestational age < 37 weeks

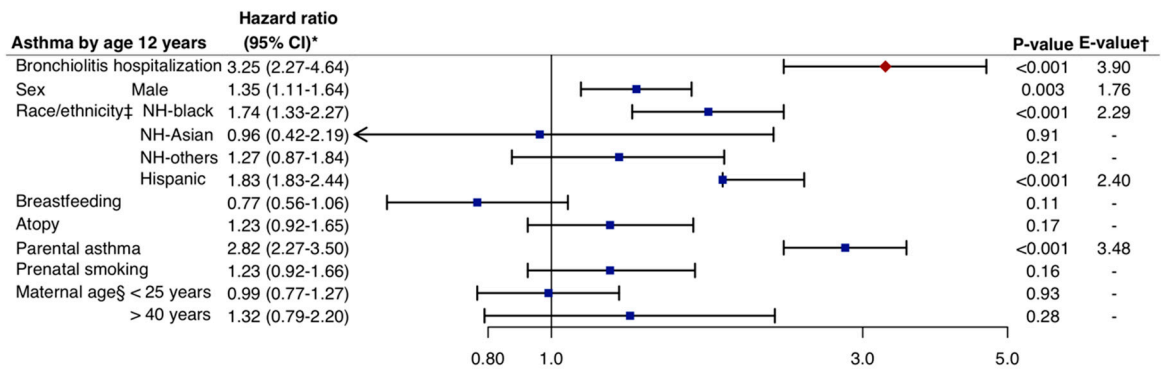

## C-2) Gestational age $\geq 37$ weeks

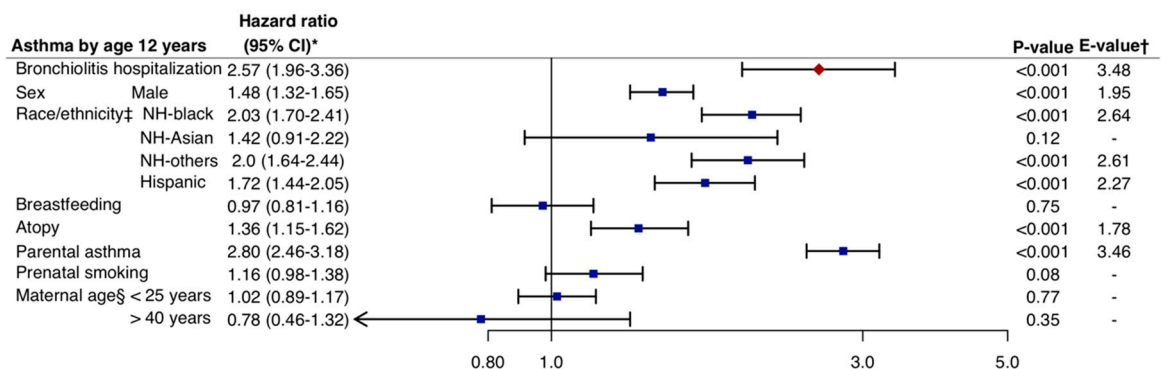

## D) Stratification by breastfeeding

### D-1) With breastfeeding

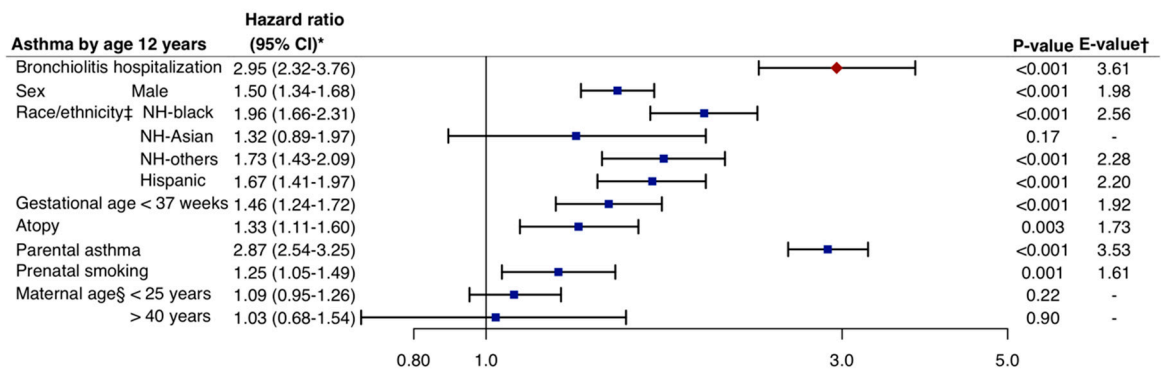

### D-2) Without breastfeeding

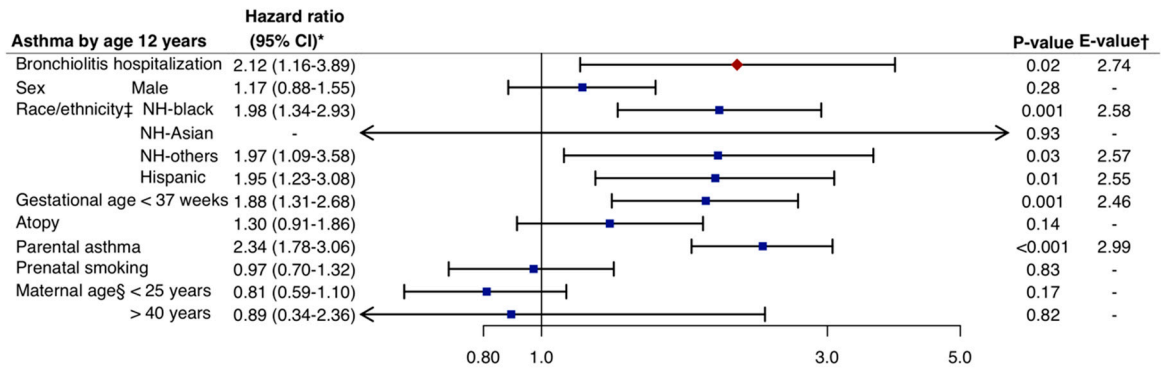

## E) Stratification by atopy

### E-1) With atopy

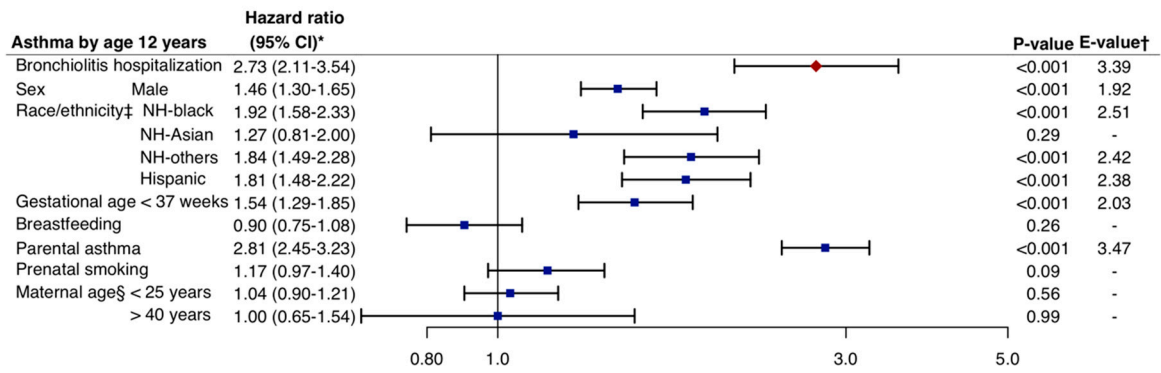

### E-2) Without atopy

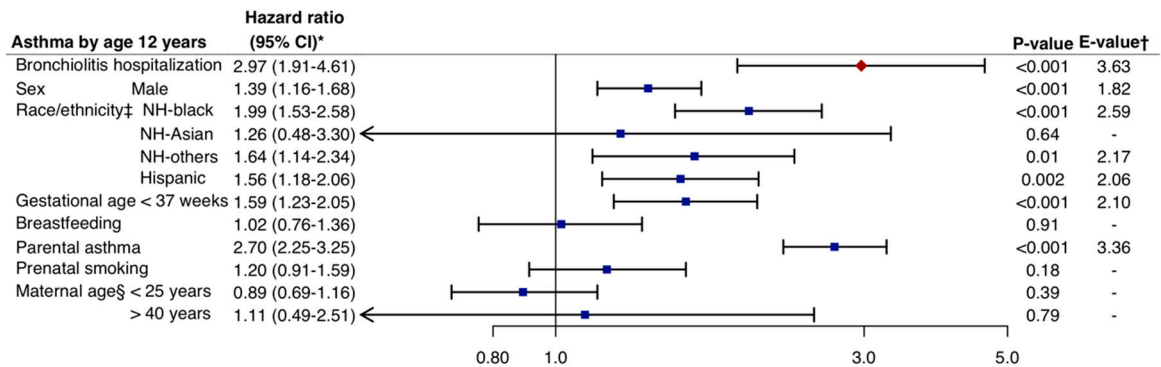

## F) Stratification by parental asthma

### F-1) With parental asthma

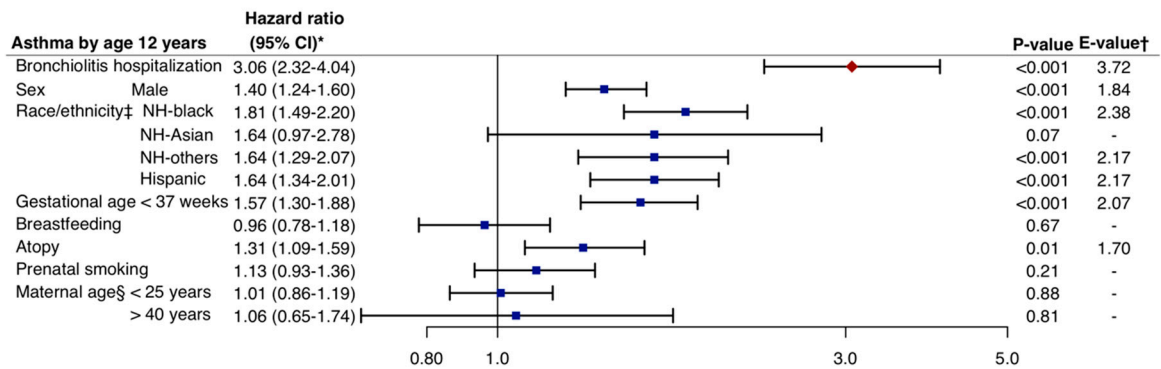

## F-2) Without parental asthma

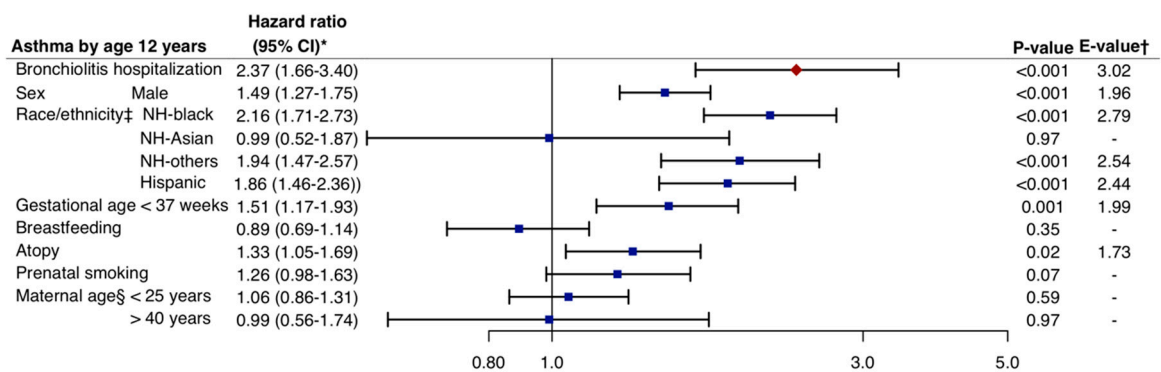

## G) Stratification by prenatal smoking

### G-1) With prenatal smoking

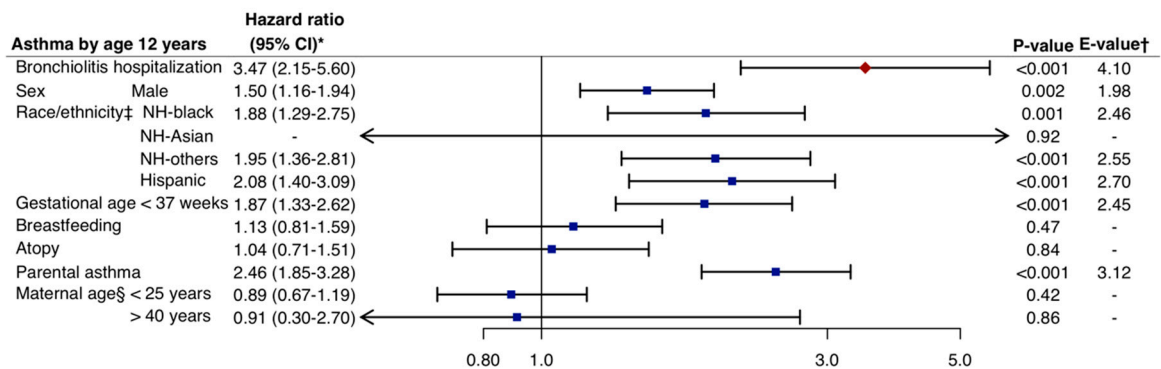

### G-2) Without prenatal smoking

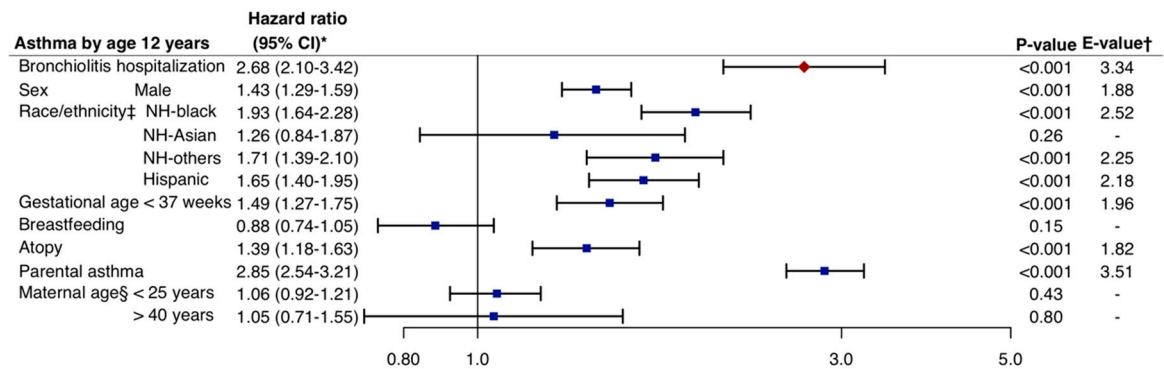

## H) Stratification by maternal age

### H-1) Maternal age < 25 years

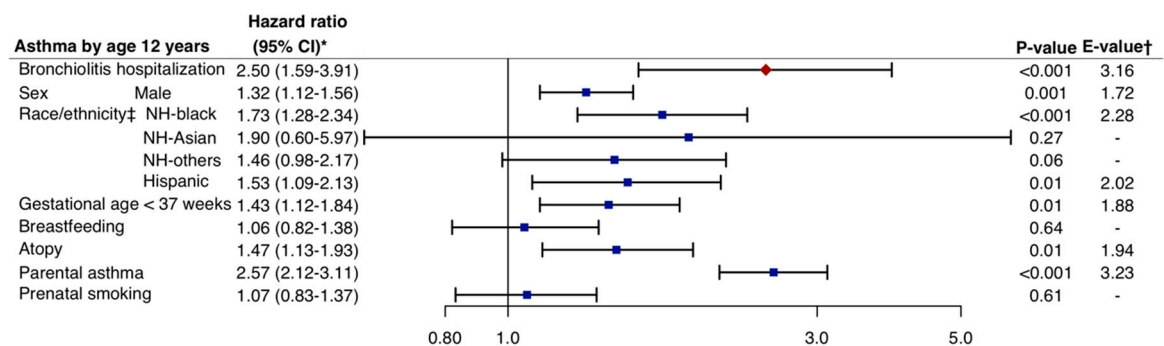

### H-2) Maternal age 25-40 years

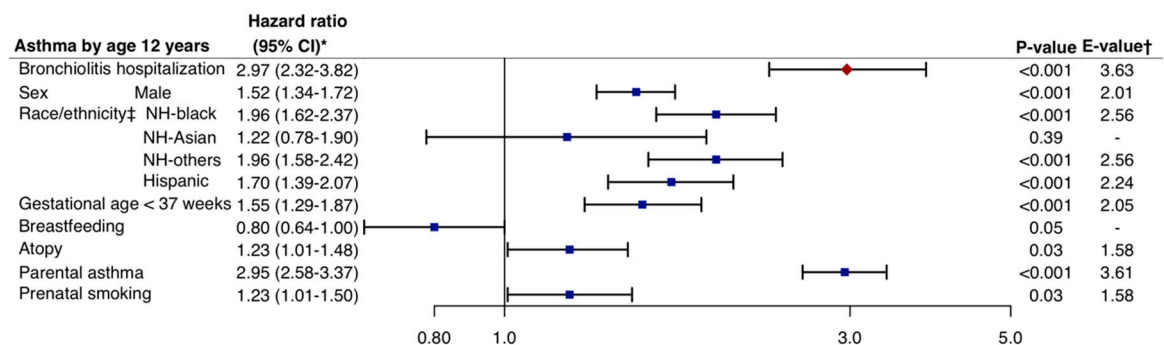

### H-3) Maternal age > 40 years

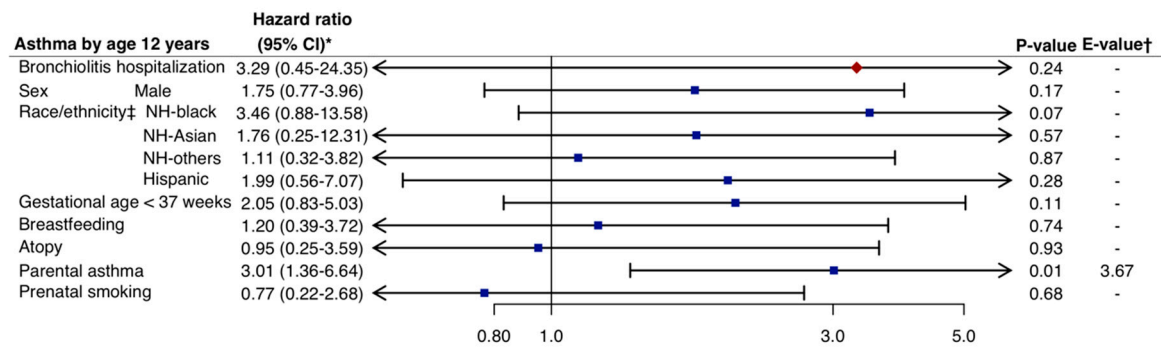

Arrows indicate that the 95% CI of the hazard ratio exceeds the lower or higher limit of the x-axis. The results of are not reported in these figures.

\* Cox proportional hazards models adjusted for the listed covariates, maternal education, and calendar year, with accounting for patient clustering by cohort

† The E-value (with its lower 95% CI bound) represents how strongly unmeasured confounder(s) would have to be associated with the exposure and outcome in order for the observed association to be independent.

‡ The reference group is non-Hispanic white.

§ The reference group is 25-40 years.

Abbreviations: CI, confidence interval; NH, Non-Hispanic
